# Supplementary material for: Synthesis of cyclic peptide disulfide–PHPMA conjugates via sequential active ester aminolysis and CuAAC coupling
Source: Royal Society of Chemistry journal article supplement (doi:10.1039/c5py01817j), 2015-12-09
Supplement: c5py01817j1.pdf [file c5py01817j1.pdf]

**Electronic Supplementary Information**

**Synthesis of Cyclic Peptide Disulfide-PHPMA  
Conjugates via Sequential Active Ester Aminolysis  
and CuAAC Coupling**

*Kemal Arda Günay, Harm-Anton Klok\**

École Polytechnique Fédérale de Lausanne (EPFL), Institut des Matériaux and Institut des  
Sciences et Ingénierie Chimiques, Laboratoire des Polymères, Bâtiment MXD, Station 12, CH-  
1015 Lausanne, Switzerland

\*To whom correspondence should be addressed: E-mail: [harm-anton.klok@epfl.ch](mailto:harm-anton.klok@epfl.ch); Fax: + 41 21 693  
5650; Tel: + 41 21 693 4866.

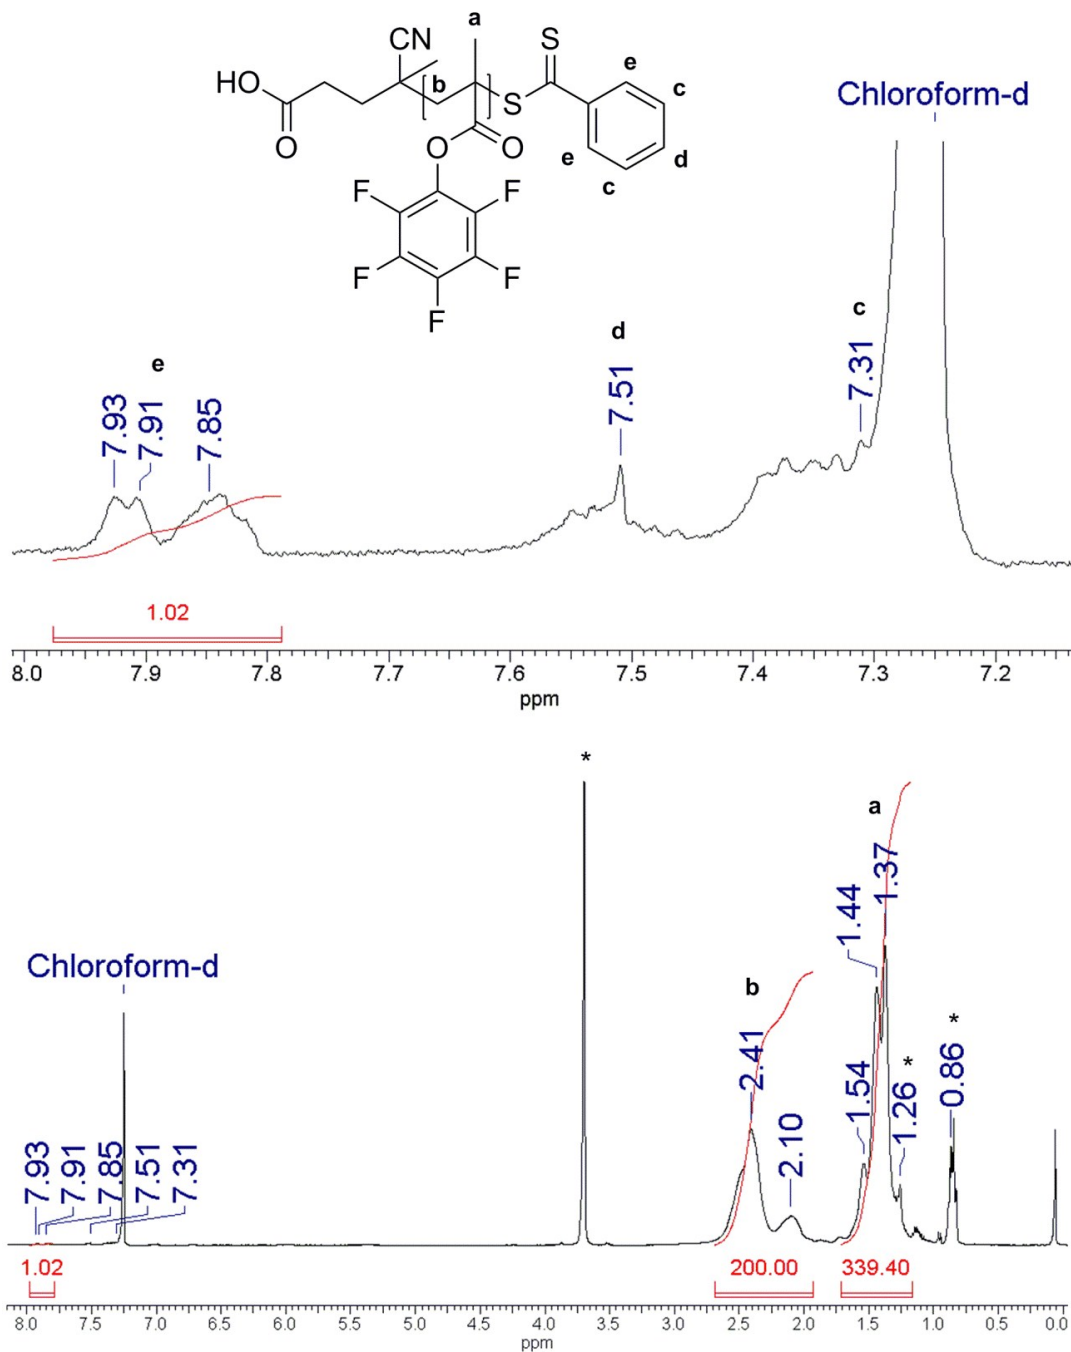

**Figure S1:** <sup>1</sup>H-NMR spectrum of the PPFMA polymer used in this study prior to removal of dithiobenzoate end-groups. **Top:** Enlarged region between 7.15–8.00 ppm highlighting the signals associated to the dithiobenzoate end-groups; **Bottom:** Complete <sup>1</sup>H-NMR spectrum of the PPFMA polymer in CDCl<sub>3</sub>. \* = Residual solvent peaks.

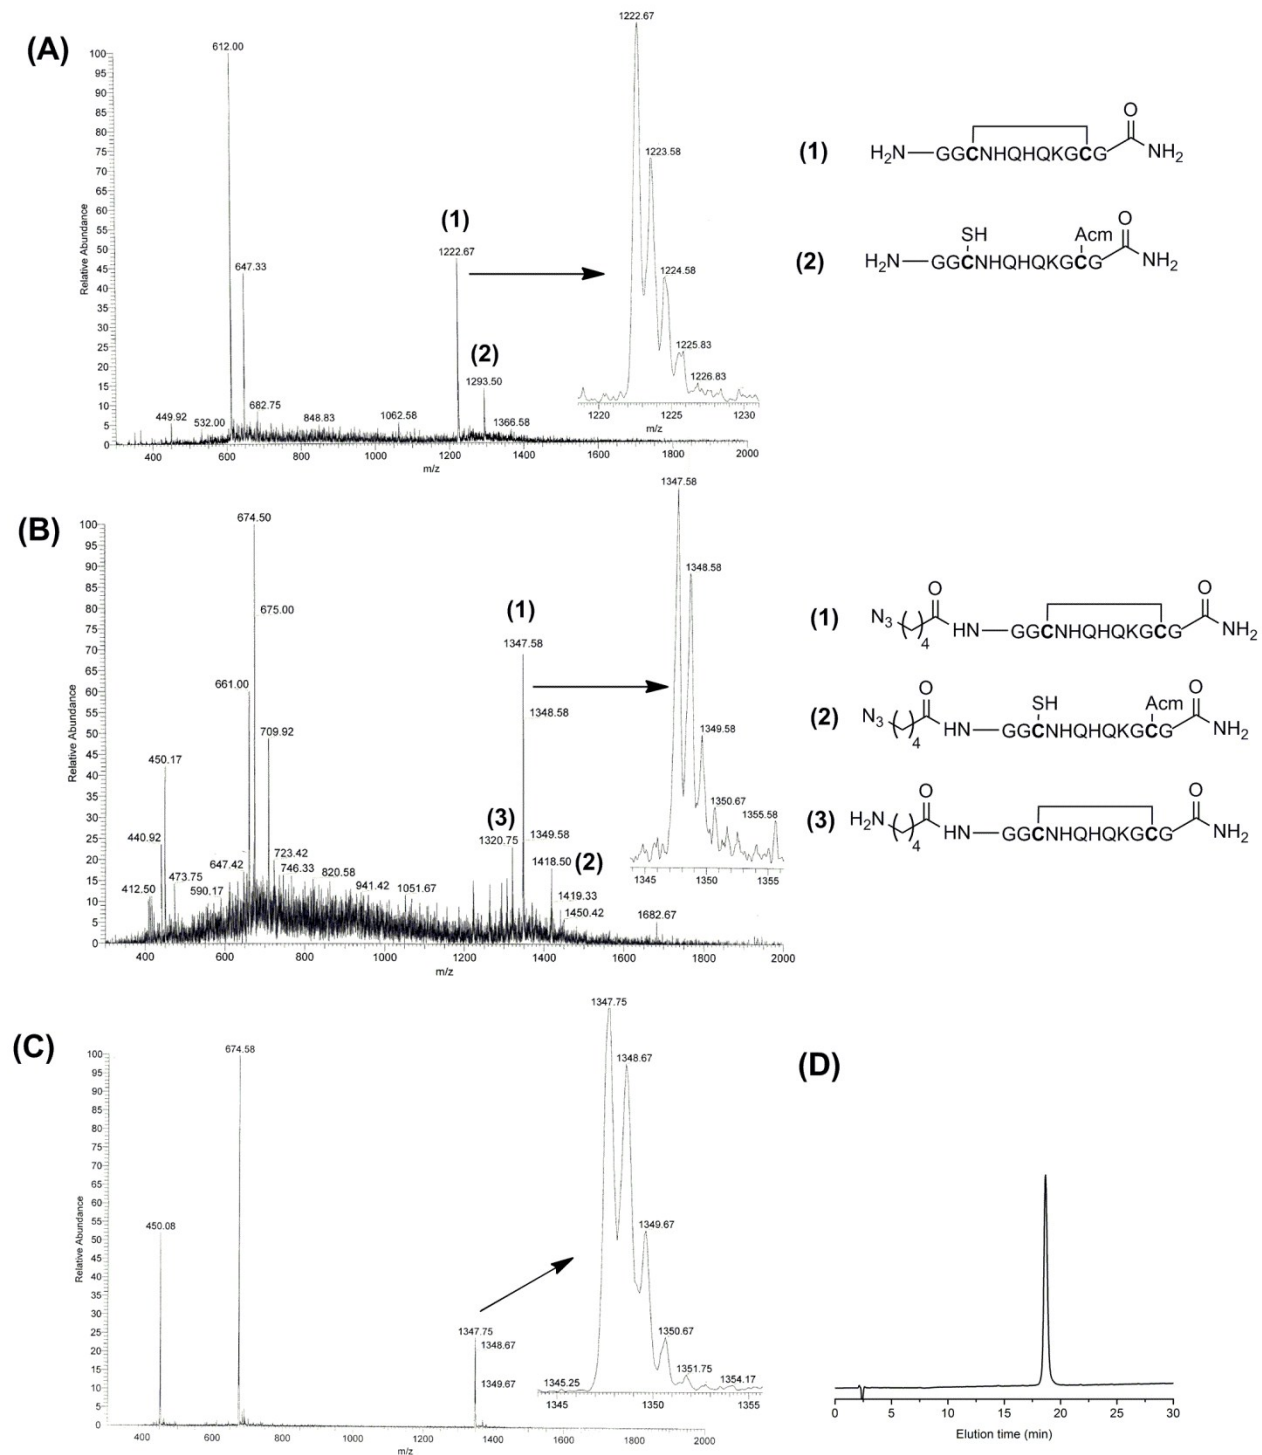

**Figure S2:** (A) ESI-MS spectrum of crude **Pep1** after  $\text{Ti}(\text{CF}_3\text{COO})_3$  mediated oxidation. (B) ESI-MS spectrum of crude **Pep1** after N-terminal azide functionalization. (C) ESI-MS spectrum and (D) HPLC elution chromatogram of pure **Pep1**.

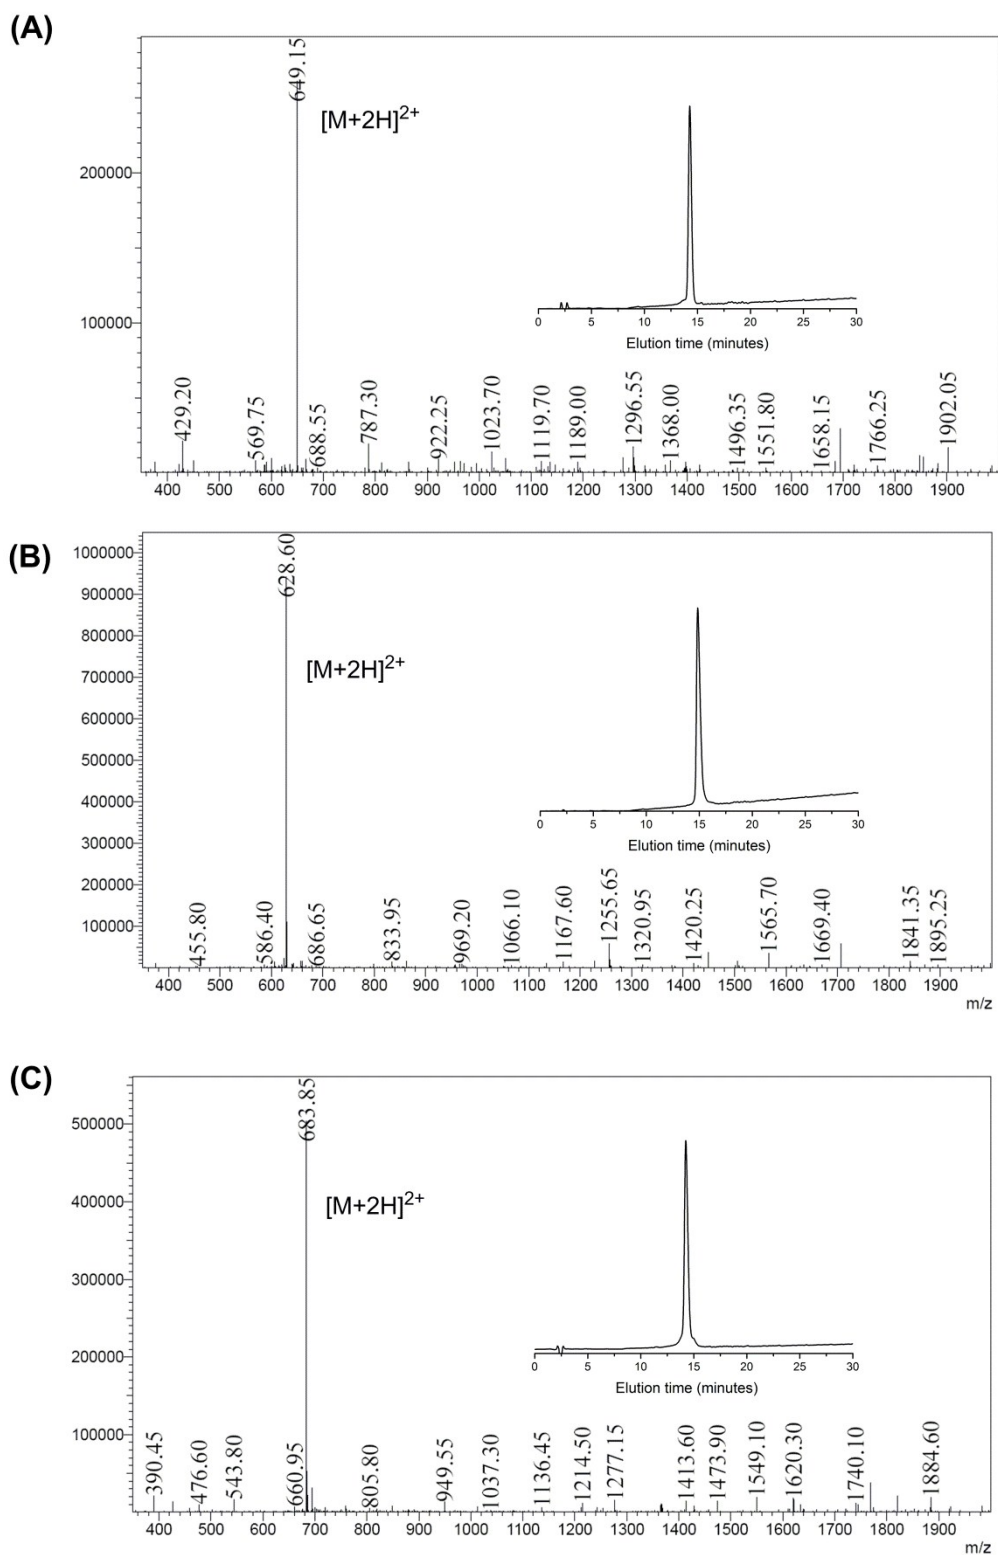

**Figure S3:** HPLC elution profiles and corresponding ESI-MS spectra of purified cyclic peptide disulfides (A) **Pep2**, (B) **Pep3** and (C) **Pep4**.

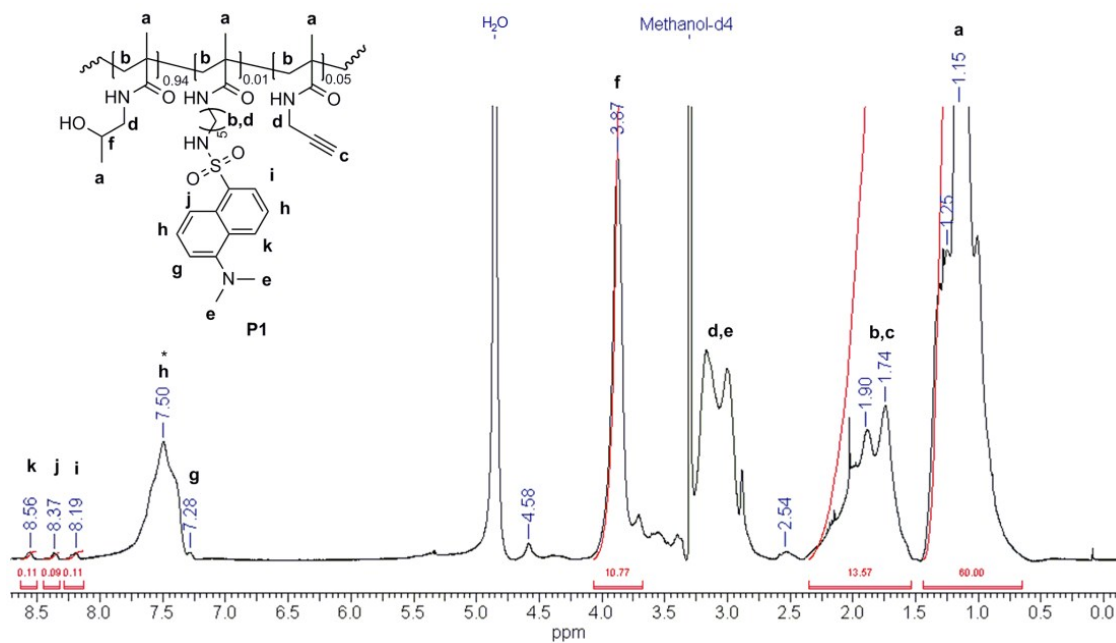

**Figure S4:**  $^1\text{H-NMR}$  spectrum of **P1** in methanol- $d_4$ . \* = 1 H peaks associated with the hydrogen of the amide groups.

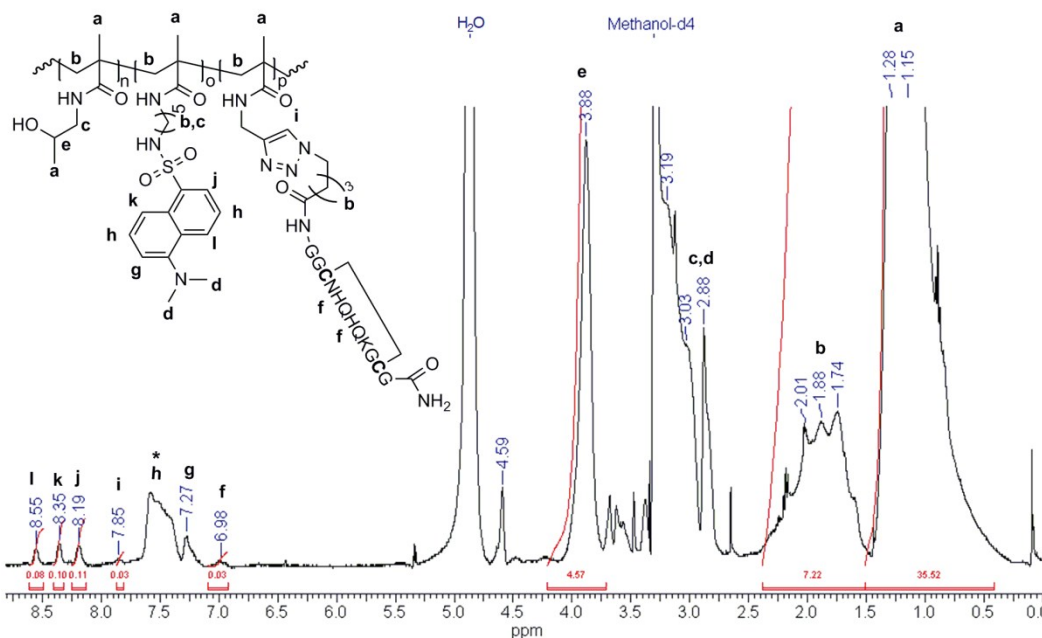

**Figure S5:**  $^1\text{H-NMR}$  spectrum of the copolymer obtained using CuAAC condition **C5 (PC5)** in methanol- $d_4$ . \* = 1H peaks associated with the hydrogen of the amide groups.

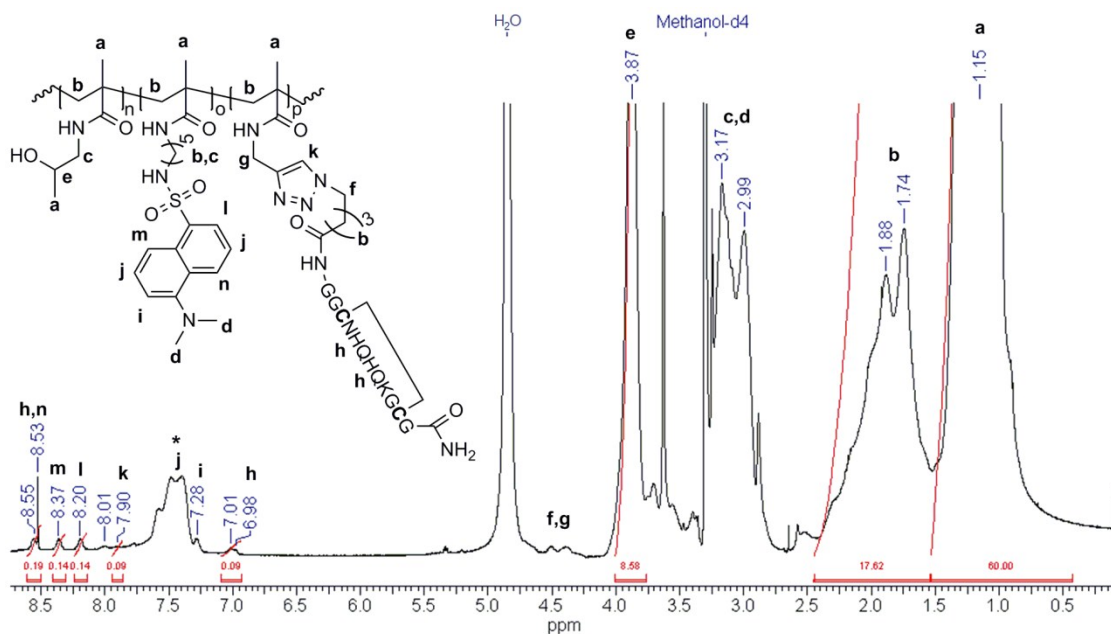

**Figure S6:**  $^1\text{H-NMR}$  spectrum of **PPep1a** in methanol- $\text{d}_4$ . \* = 1H peaks associated with the hydrogen of the amide groups.

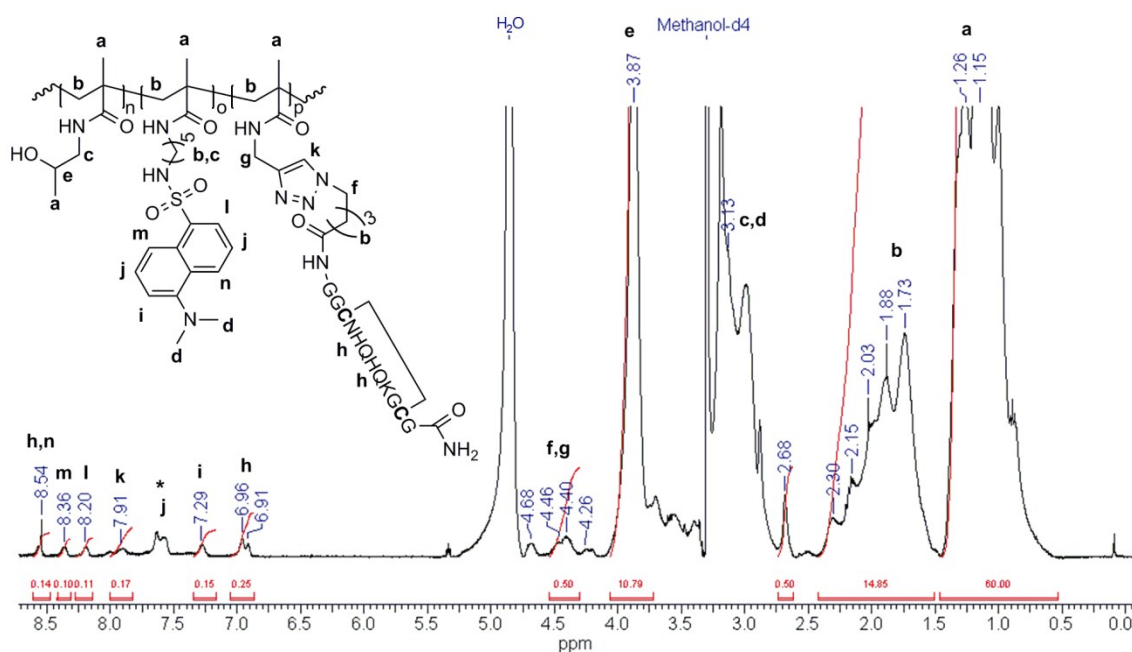

**Figure S7:**  $^1\text{H-NMR}$  spectrum of **PPep1b** in methanol- $\text{d}_4$ . \* = 1H peaks associated with the hydrogen of the amide groups.

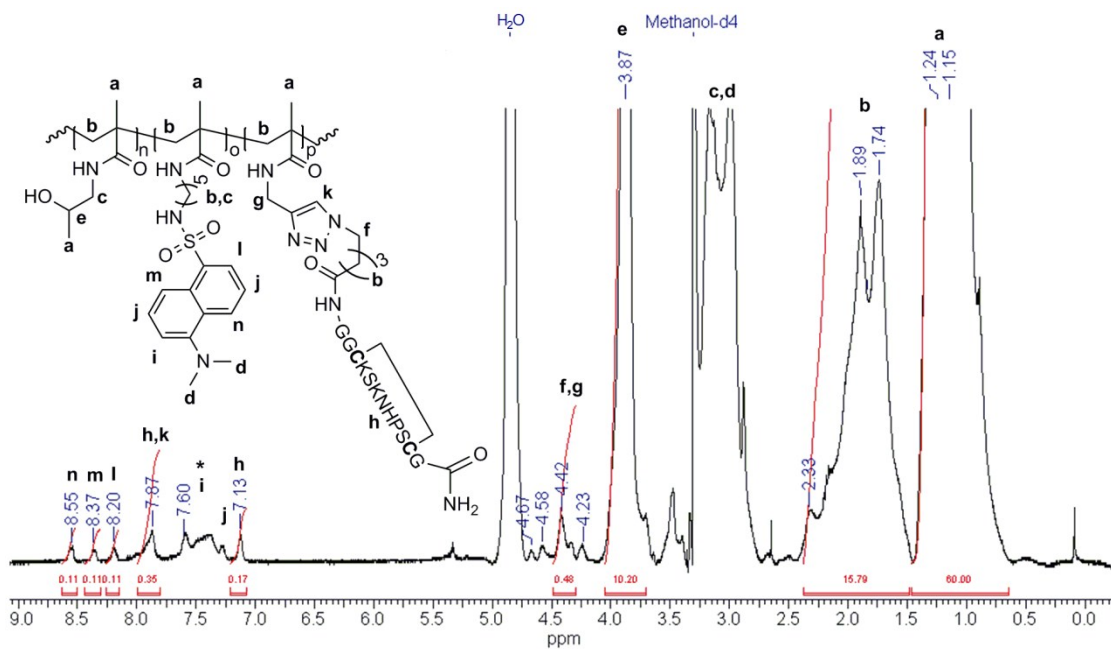

**Figure S8:** <sup>1</sup>H-NMR spectrum of **PPep2** in methanol-d<sub>4</sub>. \* = 1H peaks associated with the hydrogen of the amide groups.

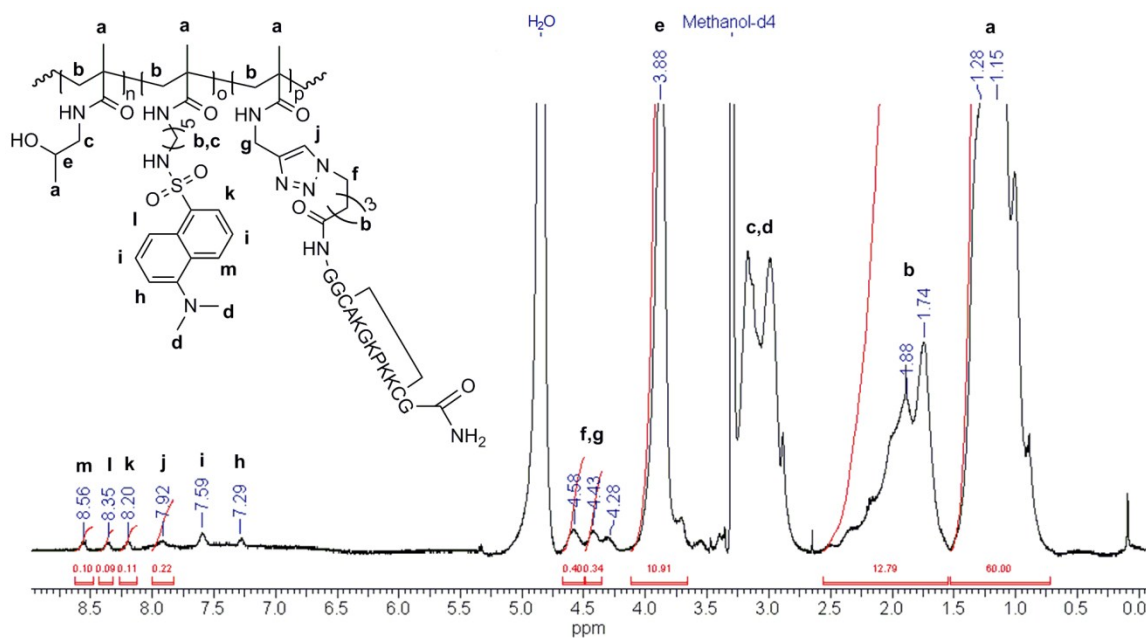

**Figure S9:** <sup>1</sup>H-NMR spectrum of **PPep3** in methanol-d<sub>4</sub>.

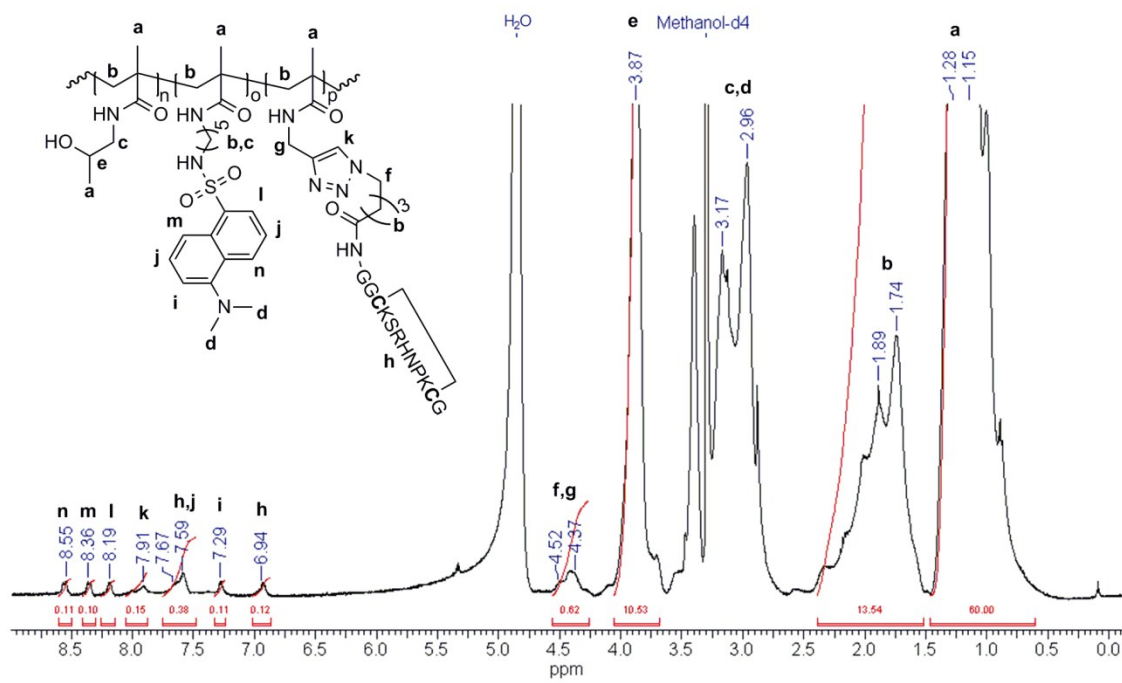

**Figure S10:** <sup>1</sup>H-NMR spectrum of **PPep4** in methanol-d<sub>4</sub>.
